# Supplementary material for: Synthesis of rattle-type SnO2 structures with porous shells
Source: Royal Society of Chemistry journal article supplement (doi:10.1039/c2jm32520a), 2012-01-01
Supplement: c2jm32520a.pdf [file c2jm32520a.pdf]

## **Electronic Supplementary Information (ESI)**

### **Synthesis of rattle-type SnO<sub>2</sub> structures with porous shell**

Lili Wang, Teng Fei,\* Jianan Deng, Zheng Lou, Rui Wang, Tong Zhang\*

State Key Laboratory on Integrated Optoelectronics, College of  
Electronic Science and Engineering, Jilin University, Changchun, 130012,  
China.

Fax: +86 431 85168270; Tel: +86 431 85168385; 、

E-mail: zhangtong@jlu.edu.cn and feiteng@jlu.edu.cn

## Experimental section

**Chemicals.**  $\text{SnCl}_2 \cdot 2\text{H}_2\text{O}$ , glutamic acid, ethanol, polyvinylpyrrolidone (PVP), tetraethyl orthosilicate (TEOS), potassium stannate trihydrate and concentrated ammonia solution (28 wt%), were of analytical grade and purchased from Shanghai Chemical Corp. Deionized water was used for all experiments.

**Synthesis of solid  $\text{SnO}_2$  nanospheres.** Briefly,  $\text{SnCl}_2 \cdot 2\text{H}_2\text{O}$  (0.23 g), and glutamic acid (3.0 g) were dissolved in ethanol (150 mL) with magnetic stirring. The obtained solution was then transferred and sealed into a Teflon-lined stainless-steel autoclave (40 mL in capacity). The autoclave was heated at 180 °C for 48 h, and then allowed to cool down to room temperature. The white products were washed with deionized water and ethanol for 3 times, respectively.

**Synthesis of core-shell  $\text{SnO}_2 @ \text{SiO}_2$  nanospheres.** A solution of polyvinylpyrrolidone (0.325 mL, 12.8 mg mL<sup>-1</sup>), was added to a  $\text{SnO}_2$  solution (0.3 g, 30 mL). The resultant mixture was stirred for 24 h to allow complete adsorption of the polymer on the  $\text{SnO}_2$  surface. After this time, the solution was centrifuged (10000 rpm; 5 min) and the supernatant was removed. The volume of the concentrated  $\text{SnO}_2$  was then adjusted to 6 mL by dilution with water. The core-shell  $\text{SnO}_2 @ \text{SiO}_2$  nanospheres were prepared through a versatile Stöber sol-gel method as follows.<sup>1</sup> Followed by addition of ethanol (18.90 mL) premixed with concentrated ammonia solution (0.84 mL, 28%  $\text{NH}_3$  in water) under ultrasound for 15 min. Afterward, a solution of TEOS (1.19 mL) in ethanol (12.80 mL) was added dropwise in 10 min, and the reaction was allowed to proceed for 10 h at room temperature under continuous mechanical stirring. The resultant core-shell  $\text{SnO}_2 @ \text{SiO}_2$  nanospheres products were separated and collected, followed by washing with deionized water and ethanol for 3 times, respectively.

**Synthesis of core-shell-shell  $\text{SnO}_2 @ \text{SiO}_2 @ \text{SnO}_2$  nanospheres.** For hydrothermal  $\text{SnO}_2$  deposition,  $\text{SnO}_2 @ \text{SiO}_2$  particles (0.118 g) were dispersed in 25 mL of

ethanol/water (37.5 vol% ethanol) mixed solvent. To this suspension, potassium stannate trihydrate (113 mg;  $K_2SnO_3 \cdot 3H_2O$ , Aldrich, 99.9%) were added. After shaking by hand for about 5 min until the salts dissolved, the suspension was transferred to a 40 mL Teflon-lined stainless-steel autoclave, which was then heated in an air flow electric oven at 170 °C for 36 h. The resultant product was separated and collected, followed by washing with deionized water and ethanol for 3 times, respectively.

***Synthesis of rattle-type  $SnO_2$  nanospheres.*** Removal of the organics and crystallization of stannic oxide were achieved by calcination in air by heating the system from room temperature to 600 °C at a rate of 5° min<sup>-1</sup>. The silica was dissolved in HF for about 30 min. Finally, the rattle-type nanospheres were washed five times with water.

***Synthesis of  $SiO_2$  nanospheres.*** A solution of tetraethylorthosilicate (1.19 mL) in ethanol (12.80 mL) was added dropwise in deionized water (6 mL) with magnetic stirring. The reaction mixture was then stirred for an additional 12 h at room temperature. The resultant colloid was centrifuged (10000 rpm; 30 min) and washed twice with water and twice with absolute ethanol.

***Synthesis of hollow  $SnO_2$  nanospheres.*** For hydrothermal  $SnO_2$  deposition,  $SiO_2$  templates (0.118 g) were dispersed in 25 mL of ethanol/water (37.5 vol% ethanol) mixed solvent. To this suspension, potassium stannate trihydrate (113 mg;  $K_2SnO_3 \cdot 3H_2O$ , Aldrich, 99.9%) were added. After shaking by hand for about 5 min until the salts dissolved, the suspension was transferred to a 40 mL Teflon-lined stainless-steel autoclave, which was then heated in an air flow electric oven at 170 °C for 36 h. The resultant product was separated and collected, followed by washing with deionized water and ethanol for 3 times, respectively. After annealing the particles at 600 °C for 6 h, the silica was dissolved in HF for about 30 min. Finally, the hollow  $SnO_2$  nanospheres were washed five times with water.

**Characterizations.** The product was characterized by X-ray diffraction (XRD) using a Rigaku D/Max-2550 diffractometer with Cu K $\alpha$  radiation ( $\lambda=1.54 \text{ \AA}$ ) (40 kV, 350 mA) in the range of 20-80° ( $2\theta$ ) at a scanning rate of 6° min<sup>-1</sup>. The morphologies of the energy dispersive X-ray (EDX) analysis were obtained on a XL 30 ESEM FEG field emission scanning electron microscope (FESEM). TEM and HRTEM images were recorded with a Tecnai G<sup>2</sup> 20S-Twin transmission electron microscope operating at an accelerating voltage of 120 and 200 kV, respectively.

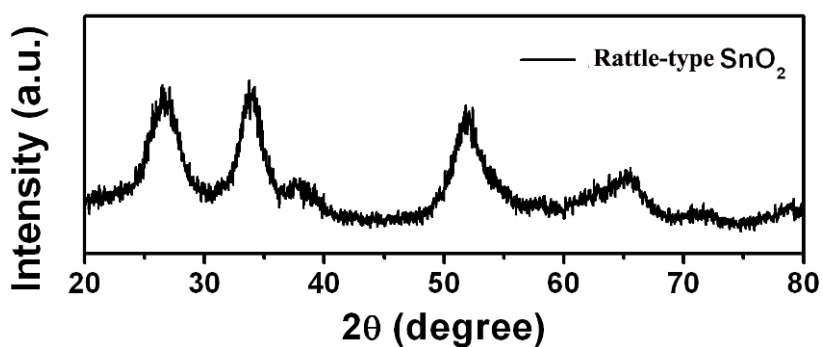

**Figure S1** XRD patterns of rattle-type SnO<sub>2</sub> nanospheres.

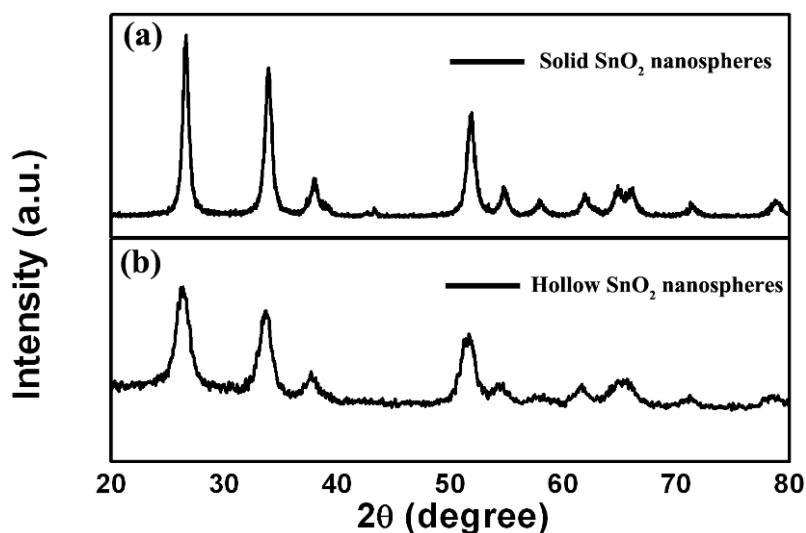

**Figure S2** XRD patterns of (a) solid and (b) hollow SnO<sub>2</sub> nanospheres.

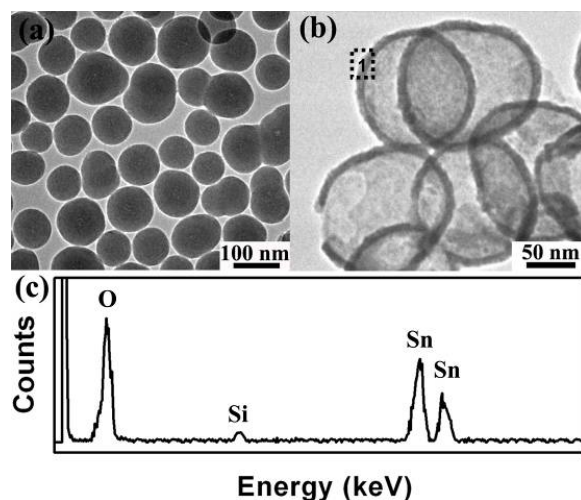

**Figure S3** (a-b) TEM images of SiO<sub>2</sub> nanospheres and hollow SnO<sub>2</sub> nanospheres. (c) The EDX spectrum of the hollow SnO<sub>2</sub> nanospheres.

### **Fabrication and measurement of gas sensor**

The product was mixed with deionized water at a weight ratio of 4:1 to form a paste. The sensor was made by a coating ceramic tube with the paste to form a thin 10  $\mu\text{m}$  sensing film. A pair of gold electrodes was installed at each end of the ceramic tube before it was coated with the paste; each electrode was connected with two Pt wires. A Ni-Cr heating wire was inserted into the tube to form an indirect-heated gas sensor. The structure of the sensor is shown in Fig. S4. The details of the sensor fabrication are similar to those reported in the literature.<sup>2</sup>

The electrical properties of the sensor were measured by a RQ-2 series Intelligent Test Meter (China). The response ( $S=R_a/R_g$ ) of the sensor is defined as the ratio of sensor resistance in dry air ( $R_a$ ) to that in a target gas ( $R_g$ ) between 160 and 390  $^{\circ}\text{C}$ . The time taken by the resistor to range from  $R_a$  to  $R_a-90\%$  ( $R_a-R_g$ ) is defined as the response time, when the sensor is exposed to the target gas. The time taken by the resistor to change from  $R_g$  to  $R_g+90\%$  ( $R_a-R_g$ ) is defined as the recovery time, when the sensor is retrieved from the target gas.

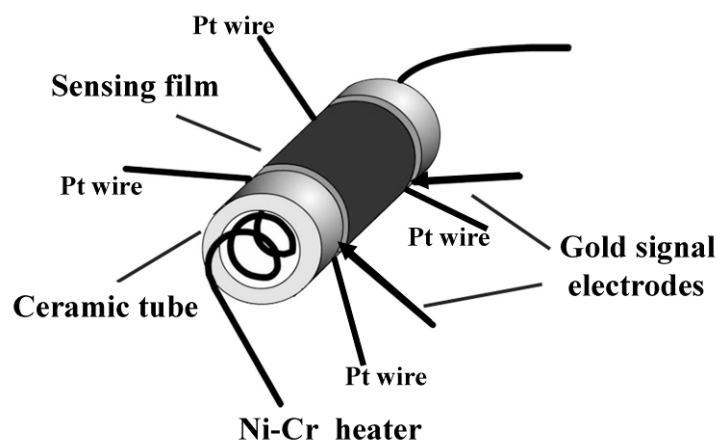

**Figure S4** Schematic structure of the gas sensor.

### References:

- 1 P. M. Arnal, M. Comotti and F. Schuth, *Angew. Chem. Int. Ed.*, 2006, **45**, 8224.
- 2 L. L. Wang, Z. Lou, T. Fei and T. Zhang, *J. Mater. Chem.*, 2011, **21**, 19331.
